# Supplementary material
Source: Springer Nature journal article supplement (https://www.springermedizin.de/resource/supplementary/12913_2010_1672_MOESM4_ESM.pdf/9528724)

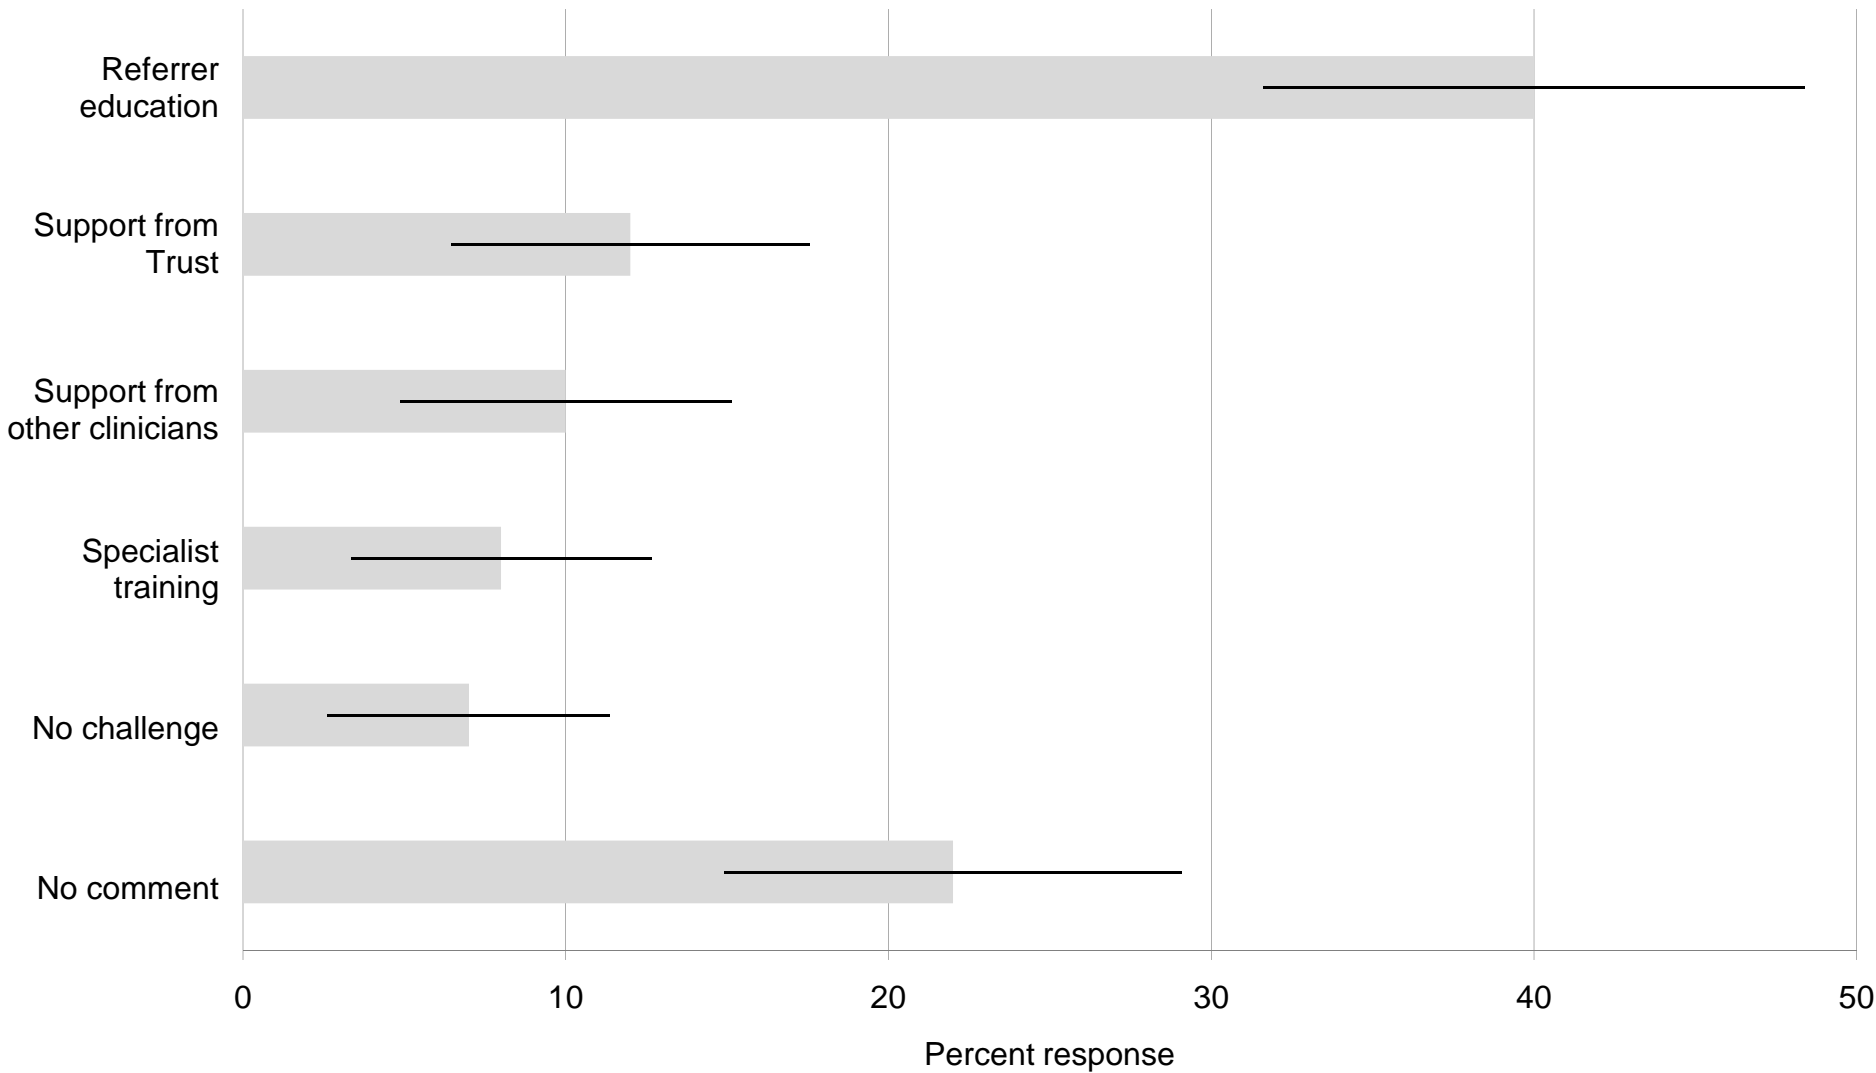

Supplement: MOESM4 [file 9528724]
